# Supplementary material for: Endotype dependent loss of tolerance in cow milk allergies is driven by antigen-specific CD4+ T cell outgrowth and gut microbial dysbiosis
Source: Research Square preprint supplement (doi:10.21203/rs.3.rs-7103135/v1), 2025-09-17
Supplement: Supplementary file 1 [file 24b982ea2d2bad124d046821.pdf]

## SUPPLEMENTARY MATERIALS

### Supplementary materials and methods

#### CM-specific CD4<sup>+</sup> T cell stimulation and characterization of CM-reactive CD4<sup>+</sup> T cells

To isolate CM-reactive T cells, frozen PBMCs were revived, rested and stimulated ( $0.5 \times 10^6/\text{ml}$ ) using 100 $\mu\text{g}/\text{ml}$  cow milk protein (CM) (*Bos taurus*, Greer Laboratories, #XPF395D3A25), 1 $\mu\text{g}/\text{ml}$  CD40 (clone: HB14, Miltenyi Biotec., #130-094-133) and 1 $\mu\text{g}/\text{ml}$  CD28 (clone:15E8, Miltenyi Biotec.,#130-093-375) functional grade antibodies for 6 hours in RPMI media containing 10% human serum (5% CO<sub>2</sub>, 37°C). After 6 hours, PBMCs were washed and stained with fluorescent-labeled antibodies and surface labeled for 30 mins at 4°C prior to fluorescent activated cell sorting (FACS) of CD154<sup>+</sup> (Tcon<sup>CM+</sup>) and CD137<sup>+</sup> (Treg<sup>CM+</sup>) on BD FACS Aria III. For intracellular staining of Foxp3 and Helios, eBioscience Foxp3/transcription factor staining buffer set (ThermoFisher, #00-5523) was used and acquired on Cytex Aurora. The following are the entire list of antibodies used:

| <i>Antibody</i>                                 | <i>Source</i>            | <i>Identifier</i> |
|-------------------------------------------------|--------------------------|-------------------|
| CD3 - BV785 (Clone: SK7)                        | BioLegend                | 344842            |
| CD4 - BUV496 (Clone: SK3)                       | BD Horizon™              | 564651            |
| CD8 - Pacific blue (Clone: SK1)                 | Biolegend                | 344718            |
| CD25 - BV711 (Clone: 2A3)                       | BD Horizon™              | 563159            |
| CD127 (IL-7R $\alpha$ ) - AF700 (Clone: A019D5) | Biolegend                | 351344            |
| CD154 (CD40L) - APC (Clone: 89-76)              | BD Biosciences           | 648887            |
| CD137 MicroBead Kit, human                      | Miltenyi Biotec          | 130-093-476       |
| CD137 PE (Clone: 4B4-1)                         | BD Pharmingen™           | 555956            |
| CD183 (CXCR3) - PE-Cy7 (Clone: G025H7)          | Biolegend                | 353720            |
| CD194 (CCR4) - BV510 (Clone: L291H4)            | Biolegend                | 359416            |
| CD196 (CCR6) - BV605 (Clone: G034E3)            | Biolegend                | 353420            |
| CCR10 - PerCP-Cy5.5 (Clone : 1B5)               | BD Pharmingen            | 564772            |
| FOXP3 - PE-Cy5 (Clone: PCH101)                  | Thermo Fisher Scientific | 15-4776-42        |
| HELIOS - FITC (Clone: REA829   22F6)            | Miltenyi Biotec          | 130-112-629       |
| Zombie NIR™ Fixable Viability Kit               | BioLegend                | 423106            |
