# Supplementary material for: Endotype dependent loss of tolerance in cow milk allergies is driven by antigen-specific CD4+ T cell outgrowth and gut microbial dysbiosis
Source: Research Square preprint supplement (doi:10.21203/rs.3.rs-7103135/v1), 2025-09-17
Supplement: Supplementary file 1 [file 524831f3f3b2aba1868734ae.xlsx]

## Sheet: Sheet1
GSEA Gene Lists
		T-helper Subsets								Non-Canonical Hyporesponsive T-helper Subsets
References		10.1126/sciimmunol.aba6087					10.3389/fimmu.2021.655027	10.1038/s41590-021-01080-3		10.1038/s41586-022-04916-6
		Th1	Th2	Th9	Treg	Tcyt	Th22	Th17		Tn (2)	Thˡⁱⁿ⁻ Tn-like (0)	Thˡⁱⁿ⁻ Tn-like blasts (1)	Thˡⁱⁿ⁻ Tfh-like (3)	Thˡⁱⁿ⁻ Tfh-like ongoing TCR (9)	Thˡⁱⁿ⁻ Treg-like (8)
		CD200	ICOS	PLA2G16	TNFRSF9	ZEB2	NR3C2	ABAT		IGFBP4	S1PR1	ACTB	IZUMO1R	TNFRSF9	RSAD2
		IFNG	GATA3	ZEB2	IL1R2	GZMB	TSHZ2	ABCA5		LY6C1	IL6R.AS1	ANXA2	CTLA4	HIVEP3	IFIT3
		XCL1	PKIA	IL13	FOXP3	TGFBR3	MT1F	ABI3		SATB1	IL6R	IFI27L2A	TBC1D4	NFKBID	IFIT3B
		CST7	RAB8B	PPARG	HLA-DRB1	ITGB7	CACNA1L	AC005832.4		LEF1	ZFP36L2	LSP1	EPHX1	BCL2A1	USP18
		CXCR3	NR4A3	GZMB	CD74	SYNE1	GBP5	AC019117.3		SELL	ITGA4	LGALS1	MXD4	GADD45B	ISG15
		IRF8	NDFIP2	PIM1	HLA-DQB1	CCL5	SERPINB6	AC021660.3		CCR7	IL7R	ACTG1	TNFSF8	SRGN	GBP6
		KLRG1	LIMA1	SOCS2	LINC00152	NKG7	KLF9	AC093525.2		TSC22D3	EGR1	ANXA6	SESN3	MARCKS11	ISG20
		TBX21	IL2	HRASLS5	HLA-DRB5	ITGAL	KLRB1	AC117378.1		BACH2	TAGAP	S100A10	TNFRSF4	CD82	SLFN5
		HOPX	PRKCA	PXDC1	MEOX1	CST7	TSPO	ADAL		IL4RA	KLF6	CNN2	INPP4B	NCL	ZBP1
		LYAR	IL17RB	FANK1	CTLA4	PFN1	CTLA4	ADAMTSL5		VPS37B	ITGB1	S100A6	RGS10	RILPL2	RNF13
		NKG7	TIGIT	JUNB	LRRC32	EFHD2	STAT4	ADARB1		GLMAP6	FOS	CRIP1	ZFP36L1	IRF4	BST2
		CCL4	HPGDS	HLF	HLA-DRB6	GAB3	TGFBR3	ADCY4		DAPL1	RFLNB	VIM	SDHAF1	BHLHE40	DAXX
		SAMD3	TNFSF11	CITED2	LAYN	VCL	RORC	AHR		GRAMD3	JUNB	PYCARD	DUSP1	NR4A1	IFI47
		TBKBP1	SLC2A3	SOCS3	PRDM1	SAMD3	MAF	AHRR		TXNIP	IER2	S100A11	CD200
		DHRS3	EGR2	CISH	TNFRSF1B	DIP2A	SMAD4	AIDA			KLF2	FLNA	RGS1
		GZMH	BCAT1	IL22	HLA-DRA	LAG3	STAT2	AKAP1			PPP1R15A
		GZMB	GCNT1	PPP1R26	HPGD	APMAP	STAT3	ANKRD34B
		LUZP1	NEK6	IL6R	MYL6B	PRF1	RORA	APLP2
		CCL5	C9orf16	RIMKLB	ZBTB32	SPON2	BATF	ARHGEF19
		GZMK	HTR2B	BCL3	FANK1	FGFBP2	SMAD7	ARMCX4
		ARHGAP26	SLC9A7	LYL1	ENTPD1	GZMH	GATA3	ARMCX6
		FGF9	RHBDD2	CCR4	CD70	GNLY	IL27RA	ASIC3
		IL18RAP	FGFR1	NCKAP5L	FAM129A	CX3CR1	FURIN	ATP2A2
		LAG3	CIRH1A	PRR5L	HLA-DPB1	GPR56	SGK1	ATP6V0D2
		YES1	ARID5B	CCL3	JAKMIP1	CTSW	RARA	ATXN10
		GNLY	PARVB	CDKN2D	LAIR2	S1PR5	YY1	B3GALNT2
		RASGRF2	UCHL3	FAM169A	BATF	GPR114	CTCF	BHLHB9
		APOBEC3H	IL6ST	TCEAL4	CCR8	PFN1P1	UCP2	BRIX1
		OAF	FNIP2	GRASP	ETV7	KIF23	SOX4	C11orf95
		ID2	PRR5L	LEF1	STX11	FCRL6	IL7R	C16orf45
		ABI3	SNED1	YBX3	PMCH	ENC1	SMC4	C8orf59
		TXK	C16orf45	CD84	PDE4A	MYO6	GZMA	CA12
		CD300A	AKAP12	MYC	PTTG1	PRSS23	NREP	CA13
		NCALD	LINC00426	SELL	UCK2	TRGC2	YBX3	CA5B
		GZMM	OTUB1	MUC2	HLA-DMA	SLAMF7	BCL11A	CAMKK2
		MTUS1	SLC25A33	MUC5AC	PTPLA	ZNF683	CDC7A	CAPSL
		AEBP1	AFAP1	CCL11	IL2RB	PLE	IGF2BP3	CCDC112
		GFI1	KRT1	MRAS	DOK2		AUTS2	CCDC137
		IGF1R	SHMT2	GZMA	NUSAP1		TGFB3	CCDC58
		CCNB1	PTPRN2	IL5RA	FAM46C		TGFBR2	CCNE2
		GNGT2	EGR3	CCL2	HLA-DQA1		SMAD2	CCP110
		APBA2	IL6R	CCL7	CSF1		P300	CDC42BPA
		SLAMF7	SELL	FCER1A	ACTA2			CDC42BPB
		ZNF844	COTL1	LCN2	SDC4			CDH10
		RASGEF1B	NOP14-AS1	SCIN	ATP1B1			CDK6
		COL6A2	FXYD5	IL17R	FLVCR2			CDKL3
		ENPP4	SEC14L2	RP11	NCF4			CENPU
		SYNM	SARDH	SH3TC1	TRIB1			CEP170
		CEBPB	CASZ1	IRX5	SPATS2L			CEP290
		CDCA7L	RAB30	RGL1	SLC1A5			CEP83
		CTSW	ARHGAP21	EFCAB8	CSF2RB			CHEK1
		TSHZ1	ATP6V0A1	FAAHP1	TNFRSF8			CLDND1
		CMC1	INF2	NRP3	STAM			CPD
		ENG	HRH2	TLR6	IL7			CPOX
		RBM11	KLF7	STARD8	STX1A			CPSF2
		MCTP2	CSGALNACT1	ANPEP	CTNNAL1			CRISPLD2
		YARS	ZBTB16	CCL17	DCP1B			CSE1L
		ATP10A	CCND1	GPR55	DUSP10			CTPS1
		IFI27	ASPH	PALLD	C15orf53			CTSC
		CHI3L2	CADM1	ADGRB2	SLC1A4			CUBN
		LAIR1	NET1	SNED1	DUSP4			CUL1
		UBE2E3	NRIP3	STRP2	OAS1			CYP1B1
		KCNQ5	ANKRD18A	PTGDR2	MGST2			DDIAS
		F2R	MFHAS1	SCAMP5	SGMS1			DDX1
		DCBLD1	DIP2B	CCL22	GPR55			DEK
		GPR160	RGS12		HLA-DPA1			DENND2C
		SMAGP	ACVR2A		CTTNBP2NL			DGCR8
		S100PBP	IFNGR2		MPST			DHFR
		ZBTB49	TRIM62		CIITA			DHFR2
		PDE9A	ARMCX4		NINJ2			DHX29
		SIPA1	DCLRE1B		CEP55			DIS3
		GZMA	DRG2		FUT7			DLG2
		SNTB1	MORC2		AHRR			DNA2
		TYMS	CENPF		HDAC9			DNTTIP2
		USP28	GAB2		HLA-DMB			DOCK3
		PTPRM	CERS6		SLC29A1			DSEL
		CCR5	SIL1		TOX			DST
		BPGM	ITPRIPL1		STAC			DTL
		E2F3	TPCN2		CPNE2			DYRK4
		PLAC8	ZDHHC23		VDR			EHD4
		LAMP3	DMWD		ANKS1B			EIF2B3
		PLSCR1	TOM1		RASGRP4			EMP1
		GBP5	NINJ2		CDKN2A			ENPP2
		GBP4	TNFRSF11A		FAIM2			EOGT
		FAM49A	NLRP2		ADPRH			EXO1
		LRRC16B	TPCN1		CD80			EZH2
		LPAR3	LYPD3		ZBTB20-AS1			FABP5
		C1orf177	POLR1A		CCR3			FAM131B
		ATP9A	SORL1		IL12A			FAM217B
		DKK3	PRC1		CCR10			FAM57A
		RCAN2	FAM169A		CARD17			FAM98A
		LGR6	GALT		LRG1			FANCA
		OR1F2P	SLFN11		PLEKHG1			FANCM
		MIR31HG	ATXN7L1		GEM			FARP2
		RUSC2	TECPR1		PAQR4			FARSB
		OR2L1P	CPA5		ATP1A3			FASTKD3
		ALOXE3	GMNN		UTS2			FER1L6
		SH3RF3	FANCI		BFSP2			FIGNL1
		GAB1	SH3PXD2A		BASP1			FKTN
		ANKRD36BP2	TADA2A		KHDC1			FNBP1L
		EPB41L3	PDE8A		CD101			FNIP2
		PDGFD	CHERP		SPSB1			FRMD6
		DTHD1	MARCKSL1		CDKL4			FUBP1
		SCNN1A	USP36		SLCO4A1			GAD2
		GPR114	UBXN7		CHRNA6			GATM
		ITGAM	CD200R1		TSHR			GCNT2
		HAVCR1	TMEM30B		ANKRD33B			GEMIN6
		PDGFB	KIAA0556		TGFB1I1			GFPT2
		TFCP2L1	PPP1R3F		PIK3R3			GLCE
		LOC388152	LRRC8D		SLC2A8			GLS2
		LOC256021	C10orf12		HIST1H3H			GMFB
		EPS8	TPX2		OLFM2			GNL3
		FBP1	MSH2		VAV3			GOLM1
		KIAA1671	SESN3		RHOXF1			GPR15
		CELA1	RHOF		WBSCR27			HELLS
		TYROBP	ANAPC2		CLNK			HNRNPA2B1
		LOC100507050	CTNNBIP1		CCRL2			HNRNPR
		OBSCN	GPX4		NCAPG			HSPA9
		ADAMTS10	C3orf52		SH3RF2			HSPH1
		LOC653075	BLOC1S3		F5			IL17A
		SLC27A3	JUNB		NEIL3			IL17F
		REREP3	TTN		IRAK3			IL2
		RAB25	CUBN		IL10			IL21
		TSHZ3	VTA1		HIP1			IL2RA
		TARP	NBPF15		ASF1B			INHBA
		S100B	AXIN2		MT1L			IPO5
		RASGEF1A	NCAPH		BACE2			IRF4
		DOCK3	CYSLTR1		CASC5			ITPA
		KIAA0182	TCP11L2		FAM124B			JPT2
		ARAP3	GLB1		CEP128			JRKL
		PLK1	CDHR3		SCG5			KATNBL1
		C17orf66	ARHGAP32		AKIP1			KDELC1
		CDC6	SLC36A1		MELK			KIF3B
		TSPAN33	EPHA4		RAD51			KIF5C
		ZNF853	ACP5		HIST1H2BL			KNOP1
		PTCH1	SLC9A9		SRGAP2			LBP
		UNC13B	FAM117B		TPX2			LGR4
		C1orf21	NBPF9		METTL7A			LIG1
		FGFBP2	CCDC141		CLSPN			LPXN
		KRT73	IKBKB		CENPW			LRP1
		PLCB1	FBLN5		AURKA			LRRC59
		LOC100499405	SH2D4A		DTL			LYAR
		GPR56	NOMO2		DEXI			MAK16
		LOC144571	DENND5A		GPR19			MALT1
		ZNF618	SEPN1		CDCA5			MAP3K20
		ME3	MORC4		CENPA			MAT2A
		A2M	ZNF512B		FAM174B			MCM10
		SLC4A4	FKBP8		TK1			MCM3
		PACSIN1	TDP2		GINS2			MCM8
		EDAR	TMEM154		LMCD1			MPHOSPH10
		MS4A1	YBEY		SLC25A35			MPHOSPH6
		SIGLECP3	CD5		ACTG2			MYH11
		DFNB31	RNF214		SLC35E4			MYO3B
		A2MP1	TCEA3		SELPLG			MYO5A
		ZCCHC18	UTS2		PTMS			N4BP1
		LOC100507421	CDK2AP2		CDC20			NAA15
		SOX13	PTK2		CHST7			NAA16
		PZP	FHIT		MCM4			NASP
		C12orf33	PACSIN2		CENPM			NCBP2
		FCRL6	POLR2I		CCNB2			NCKAP1
		KRT72	ZBED6		AARD			NCS1
		VNN2	CCDC124		AC002331.1			NDUFB4
		FLT4	FAAH2		AC011997.1			NEU3
		PTGDR	RPS5		AC017002.1			NEXN
		STAP1	SCML1		AC017002.2			NFXL1
		ENC1	AKTIP		AC021188.4			NOC3L
		EOMES	SLC40A1		AC068491.2			NSF
			GIMAP2		AC069547.1			NUDCD1
			MKL2		AC093159.1			NUDT5
			PAFAH1B3		AC093616.4			NUP133
			EMR1		AC108463.1			NUP155
			PDCL		AC108463.2			NUP85
			IL4R		AC138517.1			NUP93
			PARP12		AC233263.1			NYNRIN
			ID3		AKR7A2P1			ORC1
			FIS1		AMZ1			ORC6
			LGALS9		AP001189.4			OSGIN2
			PASK		ASPM			PAK1IP1
			IKBKE		ASS1P1			PALB2
			LEF1		AURKB			PAQR8
			PPP1CA		BCAS1			PAX6
			HAPLN3		BFSP2-AS1			PFAS
			PKP2		BIRC5			PGF
			FLJ45983		BMPR1B			PKHD1L1
			PTGDR2		BUB1			PLAGL2
			FLJ21408		BUB1B			PLOD2
			BAI2		C10orf131			POLE
			LOC100507582		C2orf48			POLE3
			CD79A		C4orf50			PPAT
			EMR4P		C5AR2			PPID
			RFX8		C9orf139			PPP1R14C
			KCNC3		CCR1			PPP2R1B
			EBF1		CD93			PRELID3B
			RAMP3		CDC25A			PRIM1
			LOC100505806		CDC45			PRKCI
			SRGAP3		CDCA2			PRR5L
			ZP1		CDHR3			PSME3
			DRP2		CDK14			PTGFRN
			ANKRD55		CDT1			PUS7
			NEFL		CEND1			RAD1
			SLC22A23		CENPE			RAD51AP1
			CYP4F12		CENPF			RBBP8
			AR		CIT			RBMX2
			ATPAF1-AS1		CKAP2L			RDX
			TLR5		CLDN4			REXO4
			CHST2		COL9A2			RHOT1
			ARHGEF4		CPE			RIN2
			RBM47		CREG2			RNASEH2B
			CDO1		CTC-232P5.1			RNMT
			MIR4440		CTC-490G23.2			RORA
			NRN1		CTD-2325P2.2			SCARNA10
			PPP1R26		CTD-2325P2.3			SCARNA18B
			LIMS2		CTD-2510F5.4			SCN4B
			CHGB		DEPDC1B			SERPINE1
			DGCR10		DLGAP5			SF3B6
			GCNT4		DOCK6			SGK1
			CHRNA6		DSCC1			SGK494
			CYBRD1		E2F2			SH3PXD2B
			LOC348761		E2F7			SHMT1
			LOC100506804		E2F8			SKP2
			SELP		EEF1A2			SLC12A2
			CLIP3		EVA1B			SLC19A2
			DPF3		EXO1			SLC25A13
			PDLIM1		FAM110C			SLC39A1
			C21orf56		FAM111B			SLC39A14
			BUB1		FAM179A			SLC43A3
			LINC00173		GFRA2			SLC44A1
			KALRN		GK-AS1			SLC4A8
			SUSD4		GREB1			SLC7A6
			TRIM2		GS1-204I12.4			SLC9A5
			DBNDD1		GTSE1			SMARCC1
			CHN2		HAP1			SMIM3
			GBGT1		HES1			SSX2IP
			PLXNA4		HIST1H2BH			ST13
			TCTEX1D4		HJURP			STK35
			PFN1P2		HLA-DOA			STX12
			TMIE		HLA-DQA2			STXBP4
			ZSWIM1		HLA-DQB1-AS1			SYN1
			MIR221		HLA-DQB2			TAF2
			COL1A1		HMCN1			TBC1D24
			CPNE2		HMOX1			TDRKH
			IL5RA		HNRNPA1P21			TFAP2A
			ASTL		HOXB7			TFRC
			KLHL3		HS3ST3A1			TGM2
			LOC100129034		IGHV1OR15-3			TGS1
			LPAR5		IL17REL			THAP12
			C14orf132		KCNMB1			TICRR
			AK5		KIAA0101			TIMM21
			VANGL1		KIAA1598			TIMP1
			GRAPL		KIF15			TLN2
			ASAP3		KIF18B			TMTC2
			GCET2		KIF23			TMTC3
			HVCN1		KIF4A			TNFRSF13B
			CACNA1I		KIFC1			TNIP2
			MDS2		LIN7A			TPBG
			SLC14A1		LINC00312			TRAF6
			ASPM		LINC00427			TRAPPC13
			PLXDC1		LINC00884			TRIM37
			ALS2CL		LINC00885			TRIM9
			CTSL1		LRRC2			TSPAN6
			SDK2		MACC1			TXLNA
			C1orf95		MCM10			UBE2Q2
			DIP2C		MICD			UCHL5
			SRGAP2P2		MIR4435-1HG			USP46
			ATP1A3		MIR4435-2			USP49
			EDN1		MKI67			VMP1
			FGFR2		MND1			WDFY4
			COL9A2		MYBL2			WDHD1
			EPHA1		MYOF			WDR75
			LOC254100		NEK2			XRCC2
			LOC100128420		NTNG2			ZBTB18
			LOC100506866		OGN			ZC3H12D
			CIT		PBK			ZIK1
			NRADDP		PCDH1			ZNF25
			ZNF434		PGBD4P1			ZNF667
			FAM13A-AS1		PLS3			ZWILCH
			FILIP1L		PNMA5			ZWINT
			OBFC2A		POLQ
			GOLGA7B		PPP1R26-AS1
			LOC283174		PRR11
			PAR5		PSD3
			C6orf25		PTGS1
			LOC100505746		RAB31
			TMEM198B		RN7SL144P
			PYGM		RN7SL334P
					RN7SL399P
					RNU6-548P
					RP11-1029J19.4
					RP11-1029J19.5
					RP11-180M15.3
					RP11-181E10.3
					RP11-214O1.2
					RP11-215G15.5
					RP11-25K19.1
					RP11-265N7.2
					RP11-275I4.2
					RP11-350N15.4
					RP11-356I2.1
					RP11-367G6.3
					RP11-377G16.2
					RP11-390B4.3
					RP11-395B7.4
					RP11-434D9.2
					RP11-466P24.6
					RP11-467L13.5
					RP11-525G13.2
					RP11-546J1.1
					RP11-54F2.1
					RP11-563N4.1
					RP11-586D19.1
					RP11-62C7.2
					RP11-672A2.4
					RP11-803D5.4
					RP11-876N24.4
					RP11-91K8.4
					RP13-1016M1.2
					RP3-449O17.1
					RP4-655J12.4
					RP4-794H19.4
					RPL32P1
					RRM2
					RYR1
					SAPCD2
					SEC13P1
					SEMA3G
					SEP03
					SKA1
					SKA3
					SLC1A1
					SLC22A13
					SPC24
					SRGAP3
					ST8SIA6
					STRIP2
					TBC1D27
					TBX20
					TEX14
					TMEM108
					TNFRSF13B
					TNFRSF19
					TOR4A
					TRIM71
					TROAP
					TTYH3
					UBE2C
					VANGL1
					WSCD2
					XXYLT1-AS2
					XYLB
					ZC3H12C
