# Supplementary material for: Endotype dependent loss of tolerance in cow milk allergies is driven by antigen-specific CD4+ T cell outgrowth and gut microbial dysbiosis
Source: Research Square preprint supplement (doi:10.21203/rs.3.rs-7103135/v1), 2025-09-17
Supplement: Supplementary file 2 [file b60d138e7cc5abc1c21bdcc3.xlsx]

## Sheet: Sheet1
Genus	Kruskal_Wallis_p	Adjusted			Raw
		p_CON_vs_ALL	p_CON_vs_AD	p_CON_vs_ENP	p_CON_vs_ALL	p_CON_vs_AD	p_CON_vs_ENP
Dialister	0.0017065	0.0476077	0.000777826	0.0166098	0.0158692	0.000259275	0.00553658
R. Ruminococcus	0.00852125	0.0421758	0.0209892	0.00579795	0.0140586	0.0069964	0.00193265
Proteus	0.00774277	0.0250794	0.428141	0.00879189	0.0083598	0.142714	0.00293063
Blautia	0.011552	0.0035221	0.111889	1	0.00117403	0.0372963	0.703389
Roseburia	0.00109407	0.522022	0.00314319	0.00149785	0.174007	0.00104773	0.000499282
Akkermansia	0.0888298	1	0.0296973	0.545438	0.758751	0.00989909	0.181813
Anaerostipes	0.0270245	0.35485	0.0262614	0.058875	0.118283	0.0087538	0.019625
Pyramidobacter	0.0927518	0.211615	0	0.595906	0.105808	0	0.297953
SMB53	0.04095	0.145274	0.0153577	0.275285	0.0484246	0.00511923	0.0917616
Enterococcus	0.0408077	0.0922023	0.224371	0.00774789	0.0307341	0.0747904	0.00258263
Veillonella	0.0444391	1	0.373413	0.0431341	0.860756	0.124471	0.014378
Acidaminococcus	0.0902666	1	1	0.105877	0.618738	0.340314	0.0352922
Actinobacillus	0.305198	0.223394	1	1	0.0744647	0.561116	0.349891
Alistipes	0.965033	1	1	1	0.959916	0.723096	0.657713
Anaerotruncus	0.441655	0.306662	1	1	0.102221	0.545534	0.741453
Bacteroides	0.131122	0.610403	1	0.344116	0.203468	0.8377	0.114705
Bifidobacterium	0.841704	1	1	1	0.758866	0.89138	0.414562
Bilophila	0.484728	0.590157	1	1	0.196719	0.483373	0.932811
Bulleidia	0.152929	1	1	0.150954	0.437961	0.754936	0.0503181
Butyricicoccus	0.878374	1	1	1	0.42116	0.53668	0.500125
Butyricimonas	0.544189	1	0.643172	1	0.72498	0.214391	0.393305
C. Clostridium	0.190257	0.238232	1	1	0.0794106	0.864462	0.355133
Campylobacter	0.300658	0.442969	0.421617	0.339927	0.147656	0.140539	0.113309
Catenibacterium	0.107164	1	1	0.47753	0.365331	0.53668	0.159177
Citrobacter	0.161631	0.528408	1	0.291915	0.176136	0.799553	0.0973049
Collinsella	0.186163	1	0.562911	0.0915946	0.524352	0.187637	0.0305315
Comamonas	0.580425	1	1	0.496554	0.714633	0.578172	0.165518
Coprobacillus	0.268204	1	0.954155	1	0.339493	0.318052	0.435564
Coprococcus	0.218726	0.877752	0.143081	0.245277	0.292584	0.0476937	0.0817589
Cronobacter	0.972194	1	1	1	0.780773	0.903696	0.947645
Desulfovibrio	0.64693	1	1	1	0.422449	0.889275	0.40988
Dorea	0.138718	0.105822	1	1	0.035274	0.632684	0.414562
Dysgonomonas	0.105879	0.727322	0.106943	1	0.242441	0.0356477	0.853842
E. Clostridium	0.996018	1	1	1	0.953427	0.797272	1
Eikenella	0.81074	1	1	1	0.365331	0.794944	0.508277
Epulopiscium	0.201492	1	1	0.306555	0.920508	0.340314	0.102185
Erwinia	0.607089	1	1	1	0.860688	0.452485	0.663216
Eubacterium	0.275438	1	1	0.760051	0.660611	0.356651	0.25335
Faecalibacterium	0.302877	1	0.966458	0.170829	0.895333	0.322153	0.0569429
Fusobacterium	0.97576	1	1	1	0.964778	0.770357	0.913039
Haemophilus	0.759844	0.522022	1	1	0.174007	0.918425	0.549626
Holdemania	0.220789	0.766484	0.303867	0.221645	0.255495	0.101289	0.0738818
Klebsiella	0.360923	0.939475	1	1	0.313158	0.549934	0.934961
L. Clostridium	0.0676253	0.801772	1	0.306555	0.267257	0.369476	0.102185
L. Ruminococcus	0.259217	1	0.549135	0.52166	0.895333	0.183045	0.173887
Lachnobacterium	0.119631	1	0.0766665	0.283554	0.550173	0.0255555	0.094518
Lachnospira	0.248347	1	0.619596	0.170829	0.725721	0.206532	0.0569429
Lactobacillus	0.105972	0.792093	1	0.792885	0.264031	0.813265	0.264295
Megamonas	0.908011	1	1	1	0.770273	0.695894	0.697179
Megasphaera	0.532506	1	1	0.903044	0.552123	0.627329	0.301015
Morganella	0.269674	0.442965	1	0.763694	0.147655	1	0.254565
Odoribacter	0.33616	1	0.540051	1	0.840328	0.180017	0.436357
Oscillospira	0.615157	1	1	1	0.661003	0.374742	0.744154
P. Clostridium	0.60595	0.610403	0.966357	0.904161	0.203468	0.322119	0.301387
Parabacteroides	0.289683	0.196504	1	0.275285	0.0655012	0.374742	0.0917616
Paraprevotella	0.375711	0.801772	0.579891	1	0.267257	0.193297	0.907999
Peptostreptococcus	0.47663	0.276211	1	1	0.0920704	0.442664	0.547631
Phascolarctobacterium	0.422094	0.917735	0.719855	1	0.305912	0.239952	0.800125
Porphyromonas	0.107594	0.267214	1	1	0.0890714	0.983459	0.947645
Prevotella	0.460191	1	1	1	0.357097	0.918425	0.744154
Pseudomonas	0.652748	1	1	1	0.404497	0.797902	0.531552
Pseudoramibacter Eubacterium	0.973354	1	1	1	0.840671	0.968596	0.843833
Serratia	0.980107	1	1	1	0.731286	0.938546	0.719365
Staphylococcus	0.831757	1	1	1	0.840671	0.93724	0.430712
Streptococcus	0.856896	1	1	1	0.661003	0.8377	0.549626
Succinivibrio	0.669254	0.583565	0.8101	0.893859	0.194522	0.270033	0.297953
Sutterella	0.216738	1	1	0.132491	0.629535	0.584907	0.0441636
Trabulsiella	0.745985	1	1	0.975942	0.747656	0.818609	0.325314
Turicibacter	0.0558964	1	0.107126	0.051632	0.35686	0.0357087	0.0172107
