# Supplementary material for: Endotype dependent loss of tolerance in cow milk allergies is driven by antigen-specific CD4+ T cell outgrowth and gut microbial dysbiosis
Source: Research Square preprint supplement (doi:10.21203/rs.3.rs-7103135/v1), 2025-09-17
Supplement: Supplementary file 3 [file c9b15b3a3a4e95cac8934a6b.xlsx]

## Sheet: CD137
CD137 ALL versus CON (up)				CD137 ALL versus CON (down)				CD137 AD versus CON (up)				CD137 AD versus CON (down)				CD137 ENP versus CON (up)				CD137 ENP versus CON (down)
genes	baseMean	log2FoldChange	padj	genes	baseMean	log2FoldChange	padj	genes	baseMean	log2FoldChange	padj	genes	baseMean	log2FoldChange	padj	genes	baseMean	log2FoldChange	padj	genes	baseMean	log2FoldChange	padj
DNAI2	11.2278	20.8472	1.10398e-16	AC138932.3	71.9762	-1.82482	0.0214368	AL049557.2	18.1532	22.0597	6.63983e-09	MTND1P23	609.316	-3.20718	0.0301202	CD300H	4.84465	21.2965	2.76144e-06	CCDC71	35.9772	-5.67382	0.00170258
EXOC3L4	5.81519	20.2171	0.000194042	PLCE1	19.0795	-3.39679	0.0410209	LTF	9.51172	21.9601	1.59326e-05	GAB1	78.4242	-9.87209	0.000921752	ZMYND12	10.711	20.8252	1.35628e-11	EVC	59.6412	-6.05551	0.00253146
ACER1	19.4089	20.1476	3.22501e-10	AC010864.1	20.9671	-6.64933	0.0389997	ACER1	19.4089	21.5708	1.94829e-12	TESC.AS1	3.69129	-18.1336	6.56976e-08	PIGZ	15.202	20.2475	1.18089e-11	KCNK12	38.7116	-6.2836	0.0403707
IGLV7.46	4.55338	20.0892	0.00308839	RAI14	42.0865	-6.66866	0.013501	ADGRE4P	8.4444	21.4955	2.6301e-07	AC112484.3	16.7429	-23.8667	2.64897e-13	AC008764.9	11.3968	19.672	2.98237e-10	KRT17	32.8516	-8.42139	7.28296e-05
PIGZ	15.202	19.9383	1.91694e-13	ITPK1.AS1	55.5372	-7.7641	0.00141658	SGSM1	8.49307	21.2769	7.50649e-18	LINC00470	7.68411	-24.4849	7.34236e-13	DLL3	16.797	19.6207	6.31601e-17	COL6A3	5.9647	-16.5769	9.23436e-05
UNC13B	28.9042	19.8982	1.39976e-12	GAB1	78.4242	-7.94683	0.0390856	KCND1	15.2035	21.0731	2.54206e-09					EXOC3L4	5.81519	19.6158	0.00189614	LINC00951	6.04343	-17.1917	2.45593e-05
ERICH5	13.8716	19.4289	1.05542e-08	AMOT	15.5871	-8.15575	0.0410965	AC008764.9	11.3968	20.9631	2.23909e-14					AC098847.1	7.89672	19.6067	5.14335e-08	AP002373.2	4.98619	-17.1961	2.91979e-05
NAGPA.AS1	7.22488	18.5558	1.32608e-06	HK3	61.8519	-9.49805	0.0144205	UNC13B	28.9042	20.5793	3.91048e-14					AL049557.2	18.1532	19.4671	2.37741e-05	AC008033.2	5.80244	-17.8689	0.000405816
DLL3	16.797	18.4369	1.81716e-17	GLIS3	34.6414	-10.0456	0.000958823	AC008760.2	5.48301	20.3361	1.38325e-07					SCNN1A	8.97238	19.4425	5.65626e-10	KLK14	6.89122	-18.4901	4.19439e-06
FCRL6	4.7039	18.0057	0.000515277	HDC	33.5242	-10.0877	0.0345592	IQCA1	5.20037	20.0686	4.97546e-06					NAGPA.AS1	7.22488	19.3902	3.94471e-06	AC104590.1	3.07089	-18.647	1.97612e-08
GPRC5B	7.77811	17.8514	1.47529e-06	PPP1R26P1	25.9555	-14.9306	2.74042e-05	PIGZ	15.202	20.0361	3.44692e-14					KIF7	8.50979	19.1418	3.25106e-09	CCDC168	3.23903	-19.054	9.23436e-05
AC008760.2	5.48301	17.7956	2.78459e-05	ZMYND10	11.0921	-15.4941	5.2677e-08	DLL3	16.797	20.0058	1.67587e-21					UNC13B	28.9042	18.8895	1.39781e-09	AC092139.3	4.53969	-19.0614	0.000405816
HAL	4.56928	17.6968	0.000178126	AC008033.2	5.80244	-16.3894	0.000517369	OLFM5P	2.94332	19.9341	0.000225794					ACER1	19.4089	18.8092	2.04683e-07	AC069257.1	5.33211	-19.5274	5.13213e-11
AC098847.1	7.89672	17.5837	2.01052e-07	AC005005.3	4.59382	-17.5212	5.12252e-05	ZMYND12	10.711	19.6902	8.25928e-13					AC016582.3	7.36688	18.7453	0.0043092	HTRA1	12.9657	-20.9002	0.000622605
IQCA1	5.20037	17.3037	0.000500074	AC008083.1	4.35668	-19.0811	0.00906289	ERICH5	13.8716	19.5942	2.44711e-09					IGHV1.69	12.8953	18.7006	5.83881e-12	CBSL	10.1477	-21.2985	7.86695e-16
DZIP1L	9.15551	17.1609	2.78459e-05	NLRP14	13.7725	-19.6079	3.02049e-06	IGLV7.46	4.55338	19.5455	0.00431218					GPRC5B	7.77811	18.602	4.40542e-06	IQSEC3	6.15386	-22.7505	3.27441e-12
SGSM1	8.49307	17.0309	9.77787e-11	FAM53B.AS1	2.87344	-20.0135	2.86933e-05	GPRC5B	7.77811	19.3382	2.82031e-08					REELD1	6.02929	18.3471	0.000311588	AC244157.2	8.41633	-22.8887	1.5266e-05
KCND1	15.2035	16.8794	2.72481e-05	CD163	4.51934	-20.2955	2.01052e-07	DNAI2	11.2278	19.3311	1.02262e-14					DNAI2	11.2278	18.1111	1.71982e-10	IGFBP6	2.54516	-22.9417	0.00393641
FAM20A	3.6385	16.775	0.00595532	SIGLEC17P	20.0421	-20.433	5.2677e-08	AC105001.1	7.25893	19.0901	9.4389e-12					ERICH5	13.8716	17.8329	4.40542e-06	AL158166.1	7.41723	-22.9985	4.67088e-08
AL137784.1	10.8518	16.584	0.00279066	ACSM1	7.78723	-20.6597	4.52985e-08	IGHV1.69	12.8953	19.046	2.62991e-15					KCND1	15.2035	17.7711	4.51535e-05	IGLV9.49	20.2381	-22.9994	7.46661e-10
LTF	9.51172	16.5786	0.0128074	FBLN2	2.46614	-21.26	9.90948e-05	KIF7	8.50979	18.976	3.61915e-11					SGSM1	8.49307	17.7247	5.65626e-10	HCG20	5.31103	-23.2002	1.35628e-11
AC008764.9	11.3968	16.508	3.89915e-08	MARVELD1	8.68357	-21.5656	3.0472e-16	SCN8A	5.71467	18.7047	7.7845e-06					HAL	4.56928	17.6174	0.00104772	FNDC8	11.778	-23.4557	5.35999e-11
ABCG8	16.6986	15.5155	0.000535258	KDM4D	14.3411	-22.5096	1.46867e-17	SCNN1A	8.97238	18.5192	3.85311e-11					SCN8A	5.71467	17.4794	0.000562613	AC008494.3	11.0415	-23.9608	1.68347e-17
AL049557.2	18.1532	15.4416	0.00123115	CCDC13.AS1	6.65082	-22.5936	2.24243e-12	EXOC3L4	5.81519	18.5119	0.0010323					VPREB3	5.58526	17.4398	1.66796e-07	EPHB2	14.3232	-24.572	7.96336e-06
REELD1	6.02929	14.1712	0.0128074	IGLV9.49	20.2381	-23.366	3.36274e-12	HBD	4.77054	18.2622	0.000943415					AC008760.2	5.48301	17.3311	0.000382798
ADGRE4P	8.4444	14.0234	0.0214368	LPL	30.463	-24.0577	2.37136e-24	NAGPA.AS1	7.22488	18.2155	1.14618e-06					IQCA1	5.20037	17.2492	0.00238321
AL513327.2	21.7787	13.3415	0.00906289	GPRC5C	19.446	-25.4964	1.92993e-13	AC098847.1	7.89672	17.7615	5.75055e-08					AL513327.2	21.7787	16.7424	0.000384204
VPREB3	5.58526	13.2406	0.000150799	AC016582.3	7.36688	-26.9859	1.96342e-08	REELD1	6.02929	17.5593	9.59489e-05					AC105001.1	7.25893	16.5919	7.29385e-07
ZMYND12	10.711	12.7903	0.000194042	NCAM1	8.56747	-29.3785	1.90975e-15	CD300H	4.84465	17.3306	7.9317e-05					NCAM1	8.56747	15.8715	0.00259315
IGHV1.69	12.8953	12.7084	8.44892e-06	HBD	4.77054	-30	4.09785e-11	VPREB3	5.58526	17.3203	3.45562e-09					AL137784.1	10.8518	15.8158	0.0252026
AC105001.1	7.25893	11.7839	0.00144277					AL391825.1	3.26883	16.8117	0.0033856					ABCG8	16.6986	15.5053	0.00253146
KIF7	8.50979	11.7382	0.00213647					FAM20A	3.6385	16.4492	0.00695834					PPP1R26P1	25.9555	11.3686	0.0252026
SCNN1A	8.97238	11.6877	0.00152512					AL137784.1	10.8518	16.3059	0.00326079					FZD9	23.2486	9.6906	0.0140977
IL9	19.6561	9.1919	0.000517401					DZIP1L	9.15551	15.6374	0.000235696					LTBP2	36.8801	6.86397	0.000168035
AL031708.1	41.7976	4.49183	0.0265248					NCAM1	8.56747	15.5691	0.000727364					IL22	424.411	6.15312	0.00175277
IL23A	2693.55	2.10703	0.00186968					AC016582.3	7.36688	15.03	0.0463106					LRRN3	2600.2	1.64024	0.0017671
								AL513327.2	21.7787	14.9636	0.000791468
								ABCG8	16.6986	14.8563	0.00110579
								LINC01635	5.3399	14.039	0.00704859
								HAL	4.56928	13.1539	0.0463106
								IL9	19.6561	8.54747	0.00191253
								AC023908.3	22.0204	7.84085	0.00443156

## Sheet: CD154
CD154 ALL versus CON (up)				CD154 ALL versus CON (down)				CD154 AD versus CON (up)				CD154 AD versus CON (down)				CD154 ENP versus CON (up)				CD154 ENP versus CON (down)
genes	baseMean	log2FoldChange	padj	genes	baseMean	log2FoldChange	padj	genes	baseMean	log2FoldChange	padj	genes	baseMean	log2FoldChange	padj	genes	baseMean	log2FoldChange	padj	genes	baseMean	log2FoldChange	padj
AC016582.3	7.36688	40.6253	8.29025e-17	RPL3P4	416.834	-1.10472	0.0095618	AC016582.3	7.36688	40.1091	1.77953e-17	PHBP9	24.5987	-2.10523	0.0457437	AC008760.2	5.48301	33.6119	3.13493e-15	SLC9A3R2	70.1065	-4.25561	0.0318589
SLC16A2	3.84806	32.7259	0.00010903	GNLY	4530.8	-2.30232	0.0437806	IGFBP6	2.54516	38.7165	4.63257e-11	NCCRP1	550.703	-5.02713	0.000974885	AC016582.3	7.36688	32.1895	2.89256e-09	METTL27	224.272	-4.83036	0.0250287
IGFBP6	2.54516	31.9245	9.81443e-07	PHBP9	24.5987	-2.48531	0.00780356	AC008760.2	5.48301	34.8969	1.23493e-19	C6orf223	92.2377	-5.98803	0.0333279	IGFBP6	2.54516	31.2781	7.63521e-06	PPP1R26	101.621	-6.49499	0.0222904
BOK	51.0311	25.2334	1.6634e-24	AC055813.1	13.5749	-3.07115	0.0140187	BOK	51.0311	25.7852	4.74958e-27	PPP1R26	101.621	-7.15401	0.00125807	LINC02528	60.8721	24.9208	9.89681e-30	RTL5	22.5702	-7.40868	0.00795048
PPP1R26P1	25.9555	24.7378	1.15001e-13	CSF2RB	935.802	-3.60687	0.0345717	RAB3B	40.6168	24.6121	2.11502e-17	DNAJC5B	39.5748	-7.31746	0.0138797	ZMYND15	43.1561	24.3824	3.01253e-27	AP000911.1	24.7489	-7.89256	0.0230679
AMOTL2	13.0378	23.6743	9.21816e-19	NCCRP1	550.703	-4.52202	0.0106607	LAMC1	49.9745	24.2277	2.49051e-28	IDO2	69.7805	-8.32087	0.00122136	AL353152.1	26.8527	24.3493	1.18023e-14	NEU4	23.6952	-8.24243	0.0444241
TNFRSF19	14.3464	22.9631	7.30244e-10	MMP7	333.006	-5.49815	0.0218703	S1PR3	29.7396	24.1452	5.74448e-13	CDC42EP1	39.6587	-8.35434	0.0090182	TPSB2	17.6002	24.3425	7.81252e-11	LPAL2	91.3142	-8.4354	0.000561635
LINC00942	50.0182	22.962	4.78059e-21	ALOX15B	1509.64	-5.64817	0.000218551	SIGLEC10	15.3244	23.1646	2.86957e-11	EXOC3L1	51.4245	-8.49568	0.00575925	AC092139.3	4.53969	23.78	3.34e-06	DBNDD1	36.9366	-9.48415	0.0411355
CAPS2	9.84575	22.7901	8.20985e-08	PPP1R26	101.621	-5.85012	0.0499978	PRSS23	7.25281	22.9586	5.80436e-12	LINC01539	153.076	-8.78849	2.55271e-05	AC091808.1	22.487	23.6507	1.39432e-17	LGALS12	52.6287	-10.4118	0.0344369
CFH	53.2088	22.451	5.38147e-14	TIFAB	155.798	-5.85221	0.0160748	AC091808.1	22.487	22.9037	3.21829e-19	B4GALNT3	25.3155	-8.83796	0.00438428	LINC00598	11.3544	22.3589	1.11057e-13	NTN4	22.1027	-11.7255	0.0116536
TREML4	41.8257	22.123	3.38867e-14	IGLV1.40	81.2938	-6.09475	0.00279295	BHLHE41	13.2292	22.8547	3.45923e-16	LINC01671	103.401	-9.47656	1.23995e-07	TREML4	41.8257	22.2714	3.42418e-13	FUT1	15.3521	-15.3182	0.00395921
TMPRSS13	34.4668	21.9318	1.28099e-13	PTCH2	39.9251	-6.57403	0.0421829	AF064858.1	38.4281	22.8408	4.74102e-26	AC100849.1	19.2679	-9.57877	0.0201025	PLEKHH1	10.1909	22.1138	1.60089e-15	ATP13A4	5.63476	-15.4136	0.00195815
TMEM255B	19.4439	21.7406	3.19277e-12	RTL5	22.5702	-6.69065	0.0161922	TMPRSS13	34.4668	22.7723	1.15106e-15	FZD5	25.0769	-9.68685	0.000668951	AF064858.1	38.4281	21.9903	1.4362e-20	KCNK13	27.1279	-15.7057	0.000337218
AF064858.1	38.4281	21.6221	8.70193e-22	DNAJC5B	39.5748	-7.25979	0.026906	AC003092.1	29.0255	22.536	9.1126e-27	HIST1H4F	19.32	-10.8981	0.0113758	LHFPL4	3.92033	21.9765	4.0722e-08	RHBDL3	8.23506	-16.0422	0.00296339
LINC02528	60.8721	21.4795	5.19455e-24	LILRA5	64.7911	-7.61875	0.0272482	AL031717.1	7.19758	22.3181	2.23645e-13	AR	6.80084	-15.7898	0.000459461	COLEC12	61.6523	21.6908	8.95454e-17	AL158166.1	7.41723	-16.4268	0.00289883
ROBO1	35.2065	21.4659	5.69547e-14	CYP2S1	208.224	-7.65142	0.00120274	PPP1R26P1	25.9555	22.013	1.74696e-11	LINC01426	2.85182	-16.3487	0.000616503	SVEP1	11.284	21.4974	5.02755e-13	SLC22A31	8.74767	-16.4285	0.000295179
SVEP1	11.284	21.2253	7.26749e-14	AC109446.3	8.41162	-7.68161	0.0322014	ZMYND15	43.1561	21.9207	1.98943e-25	SPAG6	18.3644	-16.8362	1.1117e-13	AC120193.1	12.3866	21.4901	1.85819e-13	PTPRB	21.8422	-16.5098	1.63144e-10
AC092139.3	4.53969	20.7858	4.78185e-05	MEFV	58.6718	-8.03137	0.00130625	TPBG	11.8135	21.6092	2.24063e-10	LINC00885	10.1667	-16.8783	1.42035e-07	EPHB2	14.3232	21.247	0.000951288	APOC1	13.0346	-16.5298	1.73931e-08
ZMYND15	43.1561	20.6745	4.62907e-21	E2F8	24.7302	-8.54246	0.032332	FAM131C	23.2603	21.3671	1.16765e-10	PTPN3	24.3793	-16.926	4.88731e-08	AC003092.1	29.0255	21.1085	3.48601e-20	ICAM5	13.3147	-16.5751	0.00130952
CHRNA7	6.09313	20.5893	8.88657e-08	RNASE1	58.9117	-9.5476	0.0106607	GGT5	48.3217	21.2673	6.28442e-12	KIR2DL3	34.2238	-17.1268	1.48388e-06	DHRS9	13.3967	21.1006	8.73497e-07	C8orf31	22.1863	-16.9622	0.000152295
OXTR	36.3938	20.4916	4.25105e-16	AL591623.1	15.1485	-9.63198	0.0221698	LINC00598	11.3544	21.2609	2.01044e-14	RHBDL3	8.23506	-18.1416	3.61128e-05	PLIN4	5.66838	21.0955	3.18117e-09	SYT4	22.1496	-17.5021	6.36289e-11
AC003092.1	29.0255	20.3605	1.78078e-20	PLVAP	46.0013	-15.6098	0.000403677	TMEM255B	19.4439	21.2351	1.76995e-12	PTHLH	15.6206	-18.2353	1.31857e-12	TMEM255B	19.4439	21.0484	2.04318e-10	AP000924.1	4.54686	-18.1443	8.68625e-07
GDF15	26.4143	20.017	4.78185e-05	NEBL	24.7909	-15.6631	4.15609e-12	ATP9A	23.8354	21.1723	9.77494e-15	AC068831.7	3.81858	-19.0013	0.000414346	AC005099.1	9.62037	20.9442	5.27777e-09	TMEM136	3.5778	-18.2881	0.00152842
CYS1	12.5884	19.9932	5.13843e-06	CCR3	51.8073	-15.7267	5.38047e-09	RASGRF1	13.0183	21.1645	2.38069e-14	LINC01010	6.92405	-19.4398	1.1586e-08	SIGLEC10	15.3244	20.7999	1.33986e-07	AC002480.1	4.52372	-18.2885	4.55595e-07
AL031717.1	7.19758	19.9196	8.79164e-10	RHBDL3	8.23506	-16.2922	0.000989928	EPHB2	14.3232	20.9448	0.000257607	ANKK1	2.63274	-20.1402	0.000641239	TMPRSS13	34.4668	20.5945	7.81252e-11	AC005300.1	6.65566	-18.5187	0.000573705
PGLYRP4	98.5789	19.9177	9.26535e-14	APOC1	13.0346	-16.7257	1.53277e-09	GDF15	26.4143	20.7695	6.5068e-06	AC008033.2	5.80244	-21.214	8.2238e-07	BOK	51.0311	20.436	1.4095e-14	NUDT9P1	16.5775	-18.5464	3.44835e-07
CYP19A1	5.58235	19.7065	5.35056e-05	SDS	6.03139	-17.0689	2.09339e-05	SH3RF2	7.46016	20.708	9.92348e-10	GAPDHP14	12.3673	-21.6857	8.18455e-09	VNN1	24.7369	20.4082	1.36822e-09	SYT17	33.3782	-19.2548	6.82946e-09
EPAS1	10.6224	19.5633	4.56538e-10	AC091182.1	18.6366	-17.2984	1.34554e-06	LINC01268	16.0644	20.4883	6.40971e-14	TMEM136	3.5778	-21.7124	2.66892e-06	RAB3B	40.6168	20.3238	5.54851e-10	MYO7B	11.4663	-19.3446	1.66156e-07
TRPC3	5.03062	19.2798	0.0207966	PADI2	91.8391	-17.701	1.6861e-07	SNTG2	7.60507	20.4418	2.09482e-08	MERTK	9.86292	-21.7829	1.77953e-17	LINC00942	50.0182	20.3121	6.46096e-15	ARHGAP23	9.58525	-19.4466	3.12004e-11
CCDC9B	5.44701	19.2203	5.38047e-09	SCIN	19.1657	-17.8116	0.000387185	TM4SF1	19.8102	20.3298	8.7361e-14	ZNF608	15.6791	-22.5113	1.82907e-18	HTR7	27.3664	20.0683	5.29068e-09	COL7A1	3.7169	-20.0191	1.48657e-06
SV2C	19.2076	19.0359	2.0895e-05	DIRAS3	27.625	-18.4039	2.9751e-08	AC093278.2	41.0429	20.2815	2.27369e-26	MAJIN	8.95526	-22.9385	2.27186e-12	GGT5	48.3217	20.0397	6.19519e-09	TP63	10.5146	-20.7014	1.85819e-13
LAMC1	49.9745	19.0343	1.92211e-16	FOXD4	15.8913	-18.6018	1.6741e-13	PLIN4	5.66838	20.1014	7.92281e-10	PYGL	33.3926	-23.1993	1.89675e-18	AL031717.1	7.19758	20.0014	5.10572e-09	COL4A4	4.76497	-20.9141	0.000674483
TPBG	11.8135	19.001	2.69881e-07	KIR2DL3	34.2238	-18.6264	2.75081e-07	OXTR	36.3938	19.9472	3.45923e-16	AC007533.1	3.74936	-23.2019	6.54255e-08	TM4SF1	19.8102	19.7227	5.76512e-11	DOCK1	23.2753	-20.9567	9.4657e-13
HTR7	27.3664	18.8771	1.26676e-08	AP3B2	4.76826	-18.7737	5.31735e-07	MMP2.AS1	10.0941	19.9222	7.15592e-10	LINC02575	12.0992	-23.3123	2.24063e-10	GDF15	26.4143	19.658	0.000233004	PPM1J	8.16477	-21.8389	2.73882e-07
TMEM155	15.6867	18.8529	2.08361e-08	MYRF	19.3246	-18.9397	3.19923e-09	TNNT2	45.1543	19.9029	6.21356e-23	LINC01119	7.36924	-23.8395	1.74696e-11	ATP9A	23.8354	19.6323	9.45171e-11	AOC1	10.8874	-21.877	0.000163646
PRSS23	7.25281	18.8355	3.04884e-07	GPRC5C	19.446	-19.0893	7.46954e-06	LINC00942	50.0182	19.8681	1.35255e-16	ITGB5	14.4284	-24.536	4.51706e-09	LANCL3	10.4928	19.6156	0.0019692	SEMA5A	4.87098	-22.0202	2.27618e-07
COLEC12	61.6523	18.8316	1.15001e-13	TMEM136	3.5778	-19.3884	0.000160146	VWA7	12.7552	19.7022	1.84189e-09	FAM124B	22.224	-24.8365	7.53668e-16	SNTG2	7.60507	19.4966	2.1939e-06	CTRC	10.3823	-22.2226	3.50905e-19
RAB3B	40.6168	18.615	5.17889e-09	PRPH2	10.1625	-19.6299	1.00695e-08	PLEKHH1	10.1909	19.6218	3.24274e-14	IL11	9.24558	-26.2183	5.92209e-20	TNFRSF19	14.3464	19.4047	4.04455e-06	KITLG	15.9687	-22.3602	4.22874e-15
PLEKHH1	10.1909	18.4572	1.38645e-11	REM1	36.219	-19.9538	9.78344e-18	TREML4	41.8257	19.5924	7.48873e-12	LTF	9.51172	-36.9389	2.42894e-14	PRSS23	7.25281	19.3378	5.21853e-07	AC104135.1	18.7549	-22.5609	2.29549e-12
LINC00598	11.3544	18.4553	7.2471e-10	AC009948.5	4.49492	-20.1679	7.57185e-09	VNN1	24.7369	19.5093	2.68299e-10	AL391825.1	3.26883	-44.64	1.2561e-23	AP002852.1	5.99979	19.0852	5.46986e-08	COL5A2	11.5506	-22.8439	4.67303e-07
TPSB2	17.6002	18.216	2.38703e-06	AL731571.1	7.44336	-20.3451	3.3513e-10	ROBO1	35.2065	19.4667	3.26315e-12	FCRL6	4.7039	-45.9121	6.46795e-27	OXTR	36.3938	19.0808	1.33085e-12	AP005212.4	3.42213	-23.1611	3.18117e-09
VWA7	12.7552	18.0901	3.19231e-07	PM20D1	8.15919	-20.4365	2.11715e-10	EPAS1	10.6224	19.1445	2.24129e-10					AC093278.2	41.0429	18.8947	3.07797e-19	C14orf132	13.7895	-23.3002	4.7048e-14
BCAR1	9.06673	17.79	0.00302855	ANKRD53	5.80511	-20.5861	2.84539e-09	HTR7	27.3664	19.1063	1.54255e-09					GSTM5	5.5191	18.6459	1.18686e-06	LINC00278	23.5874	-23.6693	1.64506e-20
LHFPL4	3.92033	17.7096	1.79709e-05	DKK3	19.2682	-20.6377	6.93047e-08	AC120193.1	12.3866	19.1038	2.54936e-12					EPAS1	10.6224	18.6031	3.02836e-08	DOCK6	31.7417	-23.9046	1.73286e-21
SNTG2	7.60507	17.5116	1.96398e-05	GAPDHP14	12.3673	-20.7091	2.35752e-07	CFH	53.2088	19.0606	1.93024e-10					TPBG	11.8135	18.5701	2.61506e-06	KRT8P39	15.1224	-24.8352	3.6863e-10
AC120193.1	12.3866	17.1393	6.49714e-09	AL592166.1	5.90364	-21.322	5.25415e-11	TPSB2	17.6002	19.0542	1.30124e-07					CHI3L1	12.2415	18.2958	0.000128023	IL11	9.24558	-24.894	4.34954e-15
FBLN2	2.46614	17.0674	0.027783	KRT86	8.41976	-21.7731	1.77414e-10	COLEC12	61.6523	19.003	8.0789e-15					CAPS2	9.84575	18.1069	0.000337218	LINC00200	17.4	-25.2974	3.46977e-09
AC244157.2	8.41633	16.9388	0.0123962	HTRA1	12.9657	-22.0789	0.000160142	GRTP1	5.78075	18.9624	1.0845e-07					BHLHE41	13.2292	18.0266	2.52517e-08	HIST1H4F	19.32	-26.3112	1.60089e-15
GSTM5	5.5191	16.6986	1.3349e-05	AATK	8.86356	-22.3146	1.57323e-14	CCDC9B	5.44701	18.7994	3.08654e-09					AMOTL2	13.0378	17.9291	2.29944e-09	IGLV7.46	4.55338	-27.7717	3.93195e-05
GRTP1	5.78075	16.5675	3.6406e-05	SPINK1	58.2485	-22.5719	6.9956e-24	LINC00346	8.10025	18.7687	4.35669e-05					CLEC4F	18.2385	17.9147	0.00066749	REELD1	6.02929	-48.1687	9.89681e-30
TUBAL3	15.9525	16.4972	0.000155321	CDA	25.7146	-23.0035	2.2721e-09	PGLYRP4	98.5789	18.6244	9.71387e-13					LINC01268	16.0644	17.8701	9.24192e-09
AC005099.1	9.62037	16.3841	1.27992e-05	AC092484.1	45.5786	-23.3874	7.79263e-20	AL353152.1	26.8527	18.3688	2.00635e-09					HTRA3	20.9569	17.5248	0.000228192
AC091808.1	22.487	16.3544	1.4056e-08	COL5A2	11.5506	-23.568	2.49106e-08	TMEM54	13.7216	18.2777	0.000111271					AARD	9.73799	17.3501	1.17777e-07
SH3RF2	7.46016	15.7466	7.9661e-05	KSR2	8.96492	-23.6386	2.2823e-17	AP002852.1	5.99979	18.1967	1.65359e-08					FBLN2	2.46614	17.2893	0.0387087
S1PR3	29.7396	15.6036	0.000143551	IDO2	69.7805	-23.6443	1.27261e-30	AC092139.3	4.53969	18.0338	0.000706847					LAMC1	49.9745	17.2756	7.19587e-12
TGM3	7.11769	15.4802	0.0154456	ARHGEF40	49.0929	-24.31	1.27261e-30	CAPS2	9.84575	17.9998	6.22758e-05					CD207	22.8779	17.0547	2.4345e-08
AP002852.1	5.99979	15.4793	1.7114e-05	DNASE1L3	38.5313	-24.8486	6.89205e-28	GSTM5	5.5191	17.6169	6.78605e-07					PGLYRP4	98.5789	16.3475	6.20358e-08
TNNT2	45.1543	15.4164	6.16079e-12	LINC00565	14.9943	-25.4113	4.82804e-18	AC244157.2	8.41633	17.4943	0.0040057					PPP1R26P1	25.9555	16.2831	7.17152e-05
CD209	5.59871	15.2004	0.000127775	NTN4	22.1027	-26.6253	7.96907e-18	AARD	9.73799	17.3458	4.33759e-09					TMEM54	13.7216	16.1619	0.00710449
LINC01268	16.0644	15.1749	1.27971e-06	IGLV7.46	4.55338	-29.7252	1.27971e-06	CYS1	12.5884	17.236	0.000140826					SH3RF2	7.46016	16.0347	0.000163646
GGT5	48.3217	14.923	5.35056e-05	EXOC3L4	5.81519	-36.9939	1.15001e-13	CD209	5.59871	17.0823	1.70201e-06					GRTP1	5.78075	15.9599	0.000284663
TM4SF1	19.8102	14.7356	3.01607e-06					LINC02528	60.8721	16.7275	1.65167e-14					S1PR3	29.7396	15.8672	0.000284663
SIGLEC10	15.3244	14.2152	0.00194441					DHRS9	13.3967	16.6304	0.000124716					TUBAL3	15.9525	15.8265	0.001027
PLIN4	5.66838	14.0466	0.000518294					SV2C	19.2076	16.4748	0.000414346					VWA7	12.7552	15.7726	0.000100005
VCAM1	20.6478	13.9496	0.00121549					AC009414.2	9.74679	16.4257	4.52412e-08					SV2C	19.2076	15.4955	0.00582948
TMEM54	13.7216	13.9116	0.034144					CHRNA7	6.09313	16.1718	8.75535e-05					CD209	5.59871	15.47	0.000255587
AC092821.1	19.3408	7.30989	0.0272482					SVEP1	11.284	16.0974	4.60061e-08					CHRNA7	6.09313	15.3024	0.0016169
CAMK1G	134.287	6.73632	0.0185789					AC005099.1	9.62037	15.7708	1.40082e-05					ROBO1	35.2065	15.2627	6.2657e-06
TMEM255A	167.304	5.60918	0.0169485					TGM3	7.11769	15.4322	0.00945573					CYS1	12.5884	15.1173	0.00894878
CLDN12	37.4441	5.20276	0.0434021					FOXD4L3	28.1804	14.9816	7.81741e-09					TNNT2	45.1543	15.0369	2.77873e-10
RRN3P2	19.5494	4.4998	0.0302912					BCAR1	9.06673	14.8064	0.0330377					VCAM1	20.6478	15.0249	0.000659802
IL13	694.653	4.31539	0.00529621					LHFPL4	3.92033	14.6744	0.000854442					LINC00346	8.10025	14.9156	0.0198833
OSGIN1	1387.34	3.21698	0.00899582					VCAM1	20.6478	13.5899	0.0010356					FAM131C	23.2603	14.8046	0.000688554
SLC11A2	2397.66	1.00011	0.0345717					NHSL2	88.6915	9.19751	6.34348e-05					CCDC9B	5.44701	14.5685	0.000270624
								CH25H	111.028	8.3657	0.0010837					MMP2.AS1	10.0941	14.1948	0.000834588
								RASSF8	17.9417	7.64032	0.0201025					STAB1	78.2857	9.82653	0.00265329
								AC096733.2	27.5055	7.48814	0.0384353					FAM20C	16.5815	8.77114	0.00240863
								IL1RL1	81.6897	7.37611	0.0120238					RASSF8	17.9417	8.33641	0.0147043
								NEBL	24.7909	6.81874	0.0420203					NEBL	24.7909	8.06225	0.00997671
								AC025171.4	10.1875	6.73313	0.0384353					CH25H	111.028	7.70682	0.0143808
								AF064858.3	47.3055	6.321	0.0264076					DNAAF1	45.8588	7.56529	0.0102445
								EHF	115.673	6.02732	0.0214976					EHF	115.673	6.8719	0.00770994
								HNRNPA1P21	88.1383	5.55293	0.014301					AF064858.3	47.3055	6.58452	0.0348225
								IL13	694.653	5.48602	1.00522e-05					EEF1A1P3	24.9226	5.60035	0.0248666
								CLNK	96.5712	5.4036	0.0106735					HNRNPA1P21	88.1383	5.38266	0.0475219
								GCKR	493.846	4.90401	0.0141597					RRN3P2	19.5494	4.91613	0.0129816
								RRN3P2	19.5494	4.86132	0.00667344					OSGIN1	1387.34	4.44035	2.21549e-05
								OSGIN1	1387.34	3.92115	7.57273e-05					AKR1C1	1524.82	3.88798	0.0161956
								TMEM200A	132.379	3.51222	0.0156479					MIR3945HG	1524.75	3.64289	0.0140959
								XYLT1	120.38	3.04618	0.00772451					CCL4L2	10866.9	3.36534	0.00448753
								PTPRM	450.34	2.86548	0.0457437					AC122718.1	41.9483	1.32978	0.0193584
								TMEM131	455.252	2.05099	0.0090182
								RAB11FIP4	2472.11	1.07695	0.0273992
								SCAF11	2903.86	1.00528	0.0149503
