# Supplementary material for: Endotype dependent loss of tolerance in cow milk allergies is driven by antigen-specific CD4+ T cell outgrowth and gut microbial dysbiosis
Source: Research Square preprint supplement (doi:10.21203/rs.3.rs-7103135/v1), 2025-09-17
Supplement: Supplementary file 4 [file df61b6626a48e0309ba18fcd.xlsx]

## Sheet: Sheet1
CON vs ALL
Bacterial classification	Mean abundance (Log transformed)	Group	LDA score	p-value
k__Bacteria.p__Proteobacteria.c__Gammaproteobacteria.o__Pasteurellales.f__Pasteurellaceae.g__Actinobacillus.s__parahaemolyticus	2.46107	CON	2.19249	0.021723
k__Bacteria.p__Firmicutes.c__Clostridia.o__Clostridiales.f___Tissierellaceae_.g__Parvimonas.s__	1.062	CON	2.57717	0.0252618
k__Bacteria.p__Firmicutes.c__Erysipelotrichi.o__Erysipelotrichales.f__Erysipelotrichaceae.g__Bulleidia.s__moorei	0.966178	CON	2.58439	0.0374083
k__Bacteria.p__Firmicutes.c__Clostridia.o__Clostridiales.f__Clostridiaceae.g__SMB53.s__	3.65546	CON	3.24186	0.0411674
k__Bacteria.p__Firmicutes.c__Clostridia.o__Clostridiales.f__Lachnospiraceae.g__Shuttleworthia.s__	0.247784	CON	3.27906	0.0351697
k__Bacteria.p__Firmicutes.c__Clostridia.o__Clostridiales.f__Lachnospiraceae.g__Blautia.s__	3.9844	CON	3.46344	0.00823902
k__Bacteria.p__Firmicutes.c__Clostridia.o__Clostridiales.f__Veillonellaceae.g__Dialister.s__	4.29849	CON	3.70916	0.0116684
k__Bacteria.p__Firmicutes.c__Clostridia.o__Clostridiales.f__Ruminococcaceae.g__Ruminococcus.s__	4.42045	CON	3.85173	0.0104056
k__Bacteria.p__Bacteroidetes.c__Bacteroidia.o__Bacteroidales.f__Porphyromonadaceae.g__Parabacteroides.s__distasonis	4.24051	CON	3.85308	0.0276821
k__Bacteria.p__Firmicutes.c__Clostridia.o__Clostridiales.f__Veillonellaceae.g__Veillonella.s__parvula	2.43264	ALL	2.10571	0.0332358
k__Bacteria.p__Bacteroidetes.c__Bacteroidia.o__Bacteroidales.f__Porphyromonadaceae.g__Porphyromonas.s__	1.83117	ALL	2.24149	0.0132546
k__Bacteria.p__Firmicutes.c__Bacilli.o__Lactobacillales.f__Enterococcaceae.g__Enterococcus.s__	2.98004	ALL	2.47057	0.0177294
k__Bacteria.p__Proteobacteria.c__Gammaproteobacteria.o__Enterobacteriales.f__Enterobacteriaceae.g__Proteus.s__	3.10214	ALL	2.6103	0.00764659
k__Bacteria.p__Proteobacteria.c__Betaproteobacteria.o__Burkholderiales.f__Comamonadaceae.g__Curvibacter.s__	0.465218	ALL	3.11358	0.0236124
k__Bacteria.p__Bacteroidetes.c__Bacteroidia.o__Bacteroidales.f___Paraprevotellaceae_.g___Prevotella_.s__	3.62717	ALL	3.46288	0.0480172
CON vs AD
Bacterial classification	Mean abundance (Log transformed)	Group	LDA score	p-value
k__Bacteria.p__Firmicutes.c__Clostridia.o__Clostridiales.f__Lachnospiraceae.g__Anaerostipes.s__	2.49395	CON	2.09087	0.0087538
k__Bacteria.p__Firmicutes.c__Clostridia.o__Clostridiales.f__Lachnospiraceae.g__Coprococcus.s__eutactus	2.12131	CON	2.21134	0.0308113
k__Bacteria.p__Firmicutes.c__Clostridia.o__Clostridiales.f___Tissierellaceae_.g__Parvimonas.s__	1.062	CON	2.23756	0.0348091
k__Bacteria.p__Bacteroidetes.c__Bacteroidia.o__Bacteroidales.f__Porphyromonadaceae.g__Dysgonomonas.s__	2.47168	CON	2.24361	0.0356477
k__Bacteria.p__Firmicutes.c__Clostridia.o__Clostridiales.f__Lachnospiraceae.g__Dorea.s__formicigenerans	2.80418	CON	2.3335	0.00496279
k__Bacteria.p__TM7.c__TM7_3.o__CW040.f__F16.g__.s__	0.447873	CON	2.61535	0.0203523
k__Bacteria.p__Firmicutes.c__Clostridia.o__Clostridiales.f__Ruminococcaceae.g__Ruminococcus.s__callidus	0.684776	CON	2.68176	0.00203551
k__Bacteria.p__Firmicutes.c__Clostridia.o__Clostridiales.f__Lachnospiraceae.g__Shuttleworthia.s__	0.247784	CON	2.71275	0.0203523
k__Bacteria.p__Firmicutes.c__Clostridia.o__Clostridiales.f__Clostridiaceae.g__SMB53.s__	3.65546	CON	3.29803	0.00511923
k__Bacteria.p__Verrucomicrobia.c__Verrucomicrobiae.o__Verrucomicrobiales.f__Verrucomicrobiaceae.g__Akkermansia.s__muciniphila	3.86696	CON	3.52386	0.00279622
k__Bacteria.p__Firmicutes.c__Clostridia.o__Clostridiales.f__Lachnospiraceae.g__Roseburia.s__	4.23893	CON	3.77464	0.00104773
k__Bacteria.p__Firmicutes.c__Clostridia.o__Clostridiales.f__Veillonellaceae.g__Dialister.s__	4.29849	CON	3.89848	0.000259275
k__Bacteria.p__Firmicutes.c__Clostridia.o__Clostridiales.f__Ruminococcaceae.g__Ruminococcus.s__	4.42045	CON	3.95091	0.00774759
k__Bacteria.p__Firmicutes.c__Bacilli.o__Turicibacterales.f__Turicibacteraceae.g__Turicibacter.s__	2.80506	AD	2.35204	0.0357087
k__Bacteria.p__Firmicutes.c__Clostridia.o__Clostridiales.f___Tissierellaceae_.g__ph2.s__	0.559689	AD	2.44647	0.0426429
k__Bacteria.p__Firmicutes.c__Bacilli.o__Gemellales.f__Gemellaceae.g__Gemella.s__	0.90868	AD	2.53391	0.0426429
k__Bacteria.p__Proteobacteria.c__Betaproteobacteria.o__Burkholderiales.f__Comamonadaceae.g__Curvibacter.s__	0.20609	AD	2.70153	0.0426429
k__Bacteria.p__Firmicutes.c__Clostridia.o__Clostridiales.f__Clostridiaceae.g__.s__	3.65053	AD	3.29734	0.0153548
CON vs ENP
Bacterial classification	Mean abundance (Log transformed)	Group	LDA score	p-value
k__Bacteria.p__Firmicutes.c__Clostridia.o__Clostridiales.f__Lachnospiraceae.g__Anaerostipes.s__	2.49395	CON	2.35376	0.0124001
k__Bacteria.p__Firmicutes.c__Bacilli.o__Turicibacterales.f__Turicibacteraceae.g__Turicibacter.s__	2.68838	CON	2.40003	0.0263575
k__Bacteria.p__Firmicutes.c__Clostridia.o__Clostridiales.f___Mogibacteriaceae_.g__.s__	2.13199	CON	2.54375	0.00436423
k__Bacteria.p__Firmicutes.c__Clostridia.o__Clostridiales.f__Lachnospiraceae.g__Dorea.s__formicigenerans	2.80418	CON	2.5783	0.0361016
k__Bacteria.p__Firmicutes.c__Clostridia.o__Clostridiales.f__Clostridiaceae.g__Clostridium.s__	2.66013	CON	2.64411	0.0406503
k__Bacteria.p__Firmicutes.c__Clostridia.o__Clostridiales.f__Lachnospiraceae.g__Blautia.s__obeum	2.30465	CON	2.65807	0.00394867
k__Bacteria.p__Firmicutes.c__Clostridia.o__Clostridiales.f__Lachnospiraceae.g__Roseburia.s__faecis	1.67377	CON	2.98058	0.000617052
k__Bacteria.p__Actinobacteria.c__Coriobacteriia.o__Coriobacteriales.f__Coriobacteriaceae.g__Collinsella.s__aerofaciens	3.55951	CON	3.23824	0.015069
k__Bacteria.p__Firmicutes.c__Clostridia.o__Clostridiales.f__Lachnospiraceae.g__Coprococcus.s__	3.87523	CON	3.39617	0.0255737
k__Bacteria.p__Firmicutes.c__Clostridia.o__Clostridiales.f__Ruminococcaceae.g__Ruminococcus.s__bromii	3.41883	CON	3.46885	0.0049899
k__Bacteria.p__Firmicutes.c__Clostridia.o__Clostridiales.f__Lachnospiraceae.g__Pseudobutyrivibrio.s__	0.819949	CON	3.58	0.0317538
k__Bacteria.p__Firmicutes.c__Clostridia.o__Clostridiales.f__Lachnospiraceae.g__Lachnospira.s__	4.11532	CON	3.71596	0.0407
k__Bacteria.p__Firmicutes.c__Clostridia.o__Clostridiales.f__.g__.s__	4.26568	CON	3.78438	0.0155771
k__Bacteria.p__Firmicutes.c__Clostridia.o__Clostridiales.f__Veillonellaceae.g__Dialister.s__	4.29849	CON	3.78771	0.00765894
k__Bacteria.p__Bacteroidetes.c__Bacteroidia.o__Bacteroidales.f__Porphyromonadaceae.g__Parabacteroides.s__distasonis	4.24051	CON	3.8152	0.0109996
k__Bacteria.p__Firmicutes.c__Clostridia.o__Clostridiales.f__Lachnospiraceae.g__Roseburia.s__	4.23893	CON	3.89163	0.000321899
k__Bacteria.p__Firmicutes.c__Clostridia.o__Clostridiales.f__Ruminococcaceae.g__Ruminococcus.s__	4.42045	CON	4.09585	0.00237482
k__Bacteria.p__Firmicutes.c__Clostridia.o__Clostridiales.f__Lachnospiraceae.g__Robinsoniella.s__peoriensis	2.08691	ENP	2.70054	0.038899
k__Bacteria.p__Firmicutes.c__Bacilli.o__Lactobacillales.f__Enterococcaceae.g__Enterococcus.s__	2.85537	ENP	2.75117	0.00481904
k__Bacteria.p__Proteobacteria.c__Gammaproteobacteria.o__Enterobacteriales.f__Enterobacteriaceae.g__Proteus.s__	2.55099	ENP	2.87938	0.00279225
k__Bacteria.p__Firmicutes.c__Clostridia.o__Clostridiales.f__Clostridiaceae.g__Clostridium.s__neonatale	4.22514	ENP	3.80735	0.00596864
k__Bacteria.p__Verrucomicrobia.c__Verrucomicrobiae.o__Verrucomicrobiales.f__Verrucomicrobiaceae.g__Akkermansia.s__muciniphila	4.35662	ENP	3.96803	0.0372755
k__Bacteria.p__Bacteroidetes.c__Bacteroidia.o__Bacteroidales.f___Paraprevotellaceae_.g___Prevotella_.s__	4.27746	ENP	3.97729	0.00486374
